# Supplementary material for: Supramolecular and theoretical perspectives of 2,2′:6′,2′′-terpyridine based Ni(ii) and Cu(ii) complexes: on the importance of C–H⋯Cl and π⋯π interactions
Source: Royal Society of Chemistry journal article supplement (doi:10.1039/d0nj00094a), 2020-01-01
Supplement: d0nj00094a1.pdf [file d0nj00094a1.pdf]

## Electronic Supplementary Information

### Supramolecular and theoretical perspective of 2,2':6',2''-terpyridine based Ni(II) and Cu(II) complexes: On the importance of C–H···Cl and $\pi\cdots\pi$ interaction

Pampi Pal,<sup>a</sup> Kinsuk Das,<sup>b</sup> Anowar Hossain,<sup>a</sup> Antonio Frontera,<sup>\*c</sup> and Subrata Mukhopadhyay<sup>\*a</sup>

<sup>a</sup>Department of Chemistry, Jadavpur University, Kolkata 700032, India

<sup>b</sup>Department of Chemistry, Chandernagore College, Hooghly, West Bengal 712136, India

<sup>c</sup>Departament de Química, Universitat de les Illes Balears, Crta. de Valldemossa km 7.5, Palma 07122, Balears, Spain

### Contents of the Supporting Information

|                   |                                                                                                                               |         |
|-------------------|-------------------------------------------------------------------------------------------------------------------------------|---------|
| <b>Table S1.</b>  | Selected crystallographic features of structures <b>1</b> and <b>2</b> .                                                      | Page S2 |
| <b>Table S2.</b>  | Selected bond distances (Å) and angles (°) in <b>1</b> and <b>2</b> .                                                         | Page S3 |
| <b>Table S3.</b>  | Geometric features (distances in Å and angles in degrees) of $\pi\cdots\pi$ interactions obtained for <b>1</b> and <b>2</b> . | Page S4 |
| <b>Table S4.</b>  | Details of Hydrogen bond distances (Å) and angles (°) for <b>1</b> and <b>2</b> .                                             | Page S5 |
| <b>Table S5.</b>  | Geometric features (distances in Å and angles in degrees) of metal $\cdots\pi$ interaction obtained for complex <b>2</b> .    | Page S5 |
| <b>Scheme S1</b>  | Schematic representations of the synthesis of complex <b>1</b> and <b>2</b> .                                                 | Page S6 |
| <b>Figure S1.</b> | Asymmetric unit of Complex <b>1</b>                                                                                           | Page S6 |
| <b>Figure S2.</b> | Asymmetric unit of Complex <b>2</b>                                                                                           | Page S7 |
| <b>Figure S3.</b> | IR spectra for Complex <b>1</b> and <b>2</b>                                                                                  | Page S7 |
| <b>Figure S4.</b> | UV-Vis-NIR spectra for Complex <b>1</b> and <b>2</b>                                                                          | Page S8 |
| <b>Figure S5.</b> | PXRD patterns of experimental powder XRD simulated pattern from single crystal data for complex <b>1</b> and <b>2</b>         | Page S8 |
| <b>Figure S6.</b> | TG curve for complex <b>1</b> and <b>2</b>                                                                                    | Page S9 |

**Table S1.** Selected crystallographic features of structures **1** and **2**

| Compound                                          | <b>1</b>                                                                        | <b>2</b>                                                         |
|---------------------------------------------------|---------------------------------------------------------------------------------|------------------------------------------------------------------|
| Empirical formula                                 | C <sub>15</sub> H <sub>15</sub> Cl <sub>2</sub> N <sub>3</sub> NiO <sub>2</sub> | C <sub>15</sub> H <sub>11</sub> Cl <sub>2</sub> CuN <sub>3</sub> |
| Formula weight                                    | 398.89                                                                          | 367.72                                                           |
| Temperature (K)                                   | 293 K                                                                           | 273 K                                                            |
| Wavelength (Å)                                    | 0.71073                                                                         | 0.71073                                                          |
| Crystal system                                    | Monoclinic                                                                      | Monoclinic                                                       |
| Space group                                       | P 2 <sub>1</sub> /n                                                             | P 2 <sub>1</sub> /c                                              |
| Unit cell dimensions                              |                                                                                 |                                                                  |
| a (Å)                                             | 12.485(6)                                                                       | 10.671(10)                                                       |
| b (Å)                                             | 9.687(4)                                                                        | 8.258(7)                                                         |
| c (Å)                                             | 14.318(6)                                                                       | 16.090(16)                                                       |
| α (°)                                             | 90                                                                              | 90                                                               |
| β (°)                                             | 105.290(15)                                                                     | 94.686(3)                                                        |
| γ (°)                                             | 90                                                                              | 90                                                               |
| Volume (Å <sup>3</sup> )                          | 1670.4(13)                                                                      | 1413.2(2)                                                        |
| Crystal size (mm <sup>3</sup> )                   | 0.07x0.13x0.21                                                                  | 0.08x0.12x0.17                                                   |
| z                                                 | 4                                                                               | 4                                                                |
| Density <sub>cal</sub> (Mg m <sup>-3</sup> )      | 1.586                                                                           | 1.728                                                            |
| Absorption coefficient (mm <sup>-1</sup> )        | 1.492                                                                           | 1.917                                                            |
| F(000)                                            | 816.0                                                                           | 740.0                                                            |
| θ Range (°) for data collection                   | 2.87 – 25.88                                                                    | 1.915 – 27.218                                                   |
| Index ranges                                      | -16 ≤ h ≤ 16<br>-12 ≤ k ≤ 12<br>-18 ≤ l ≤ 18                                    | -13 ≤ h ≤ 13<br>-10 ≤ k ≤ 10<br>-20 ≤ l ≤ 20                     |
| Goodness-of-fit on F <sup>2</sup>                 | 0.893                                                                           | 0.938                                                            |
| Independent reflections [Rint]                    | 3686 (0.035)                                                                    | 3130                                                             |
| Absorption correction                             | Multi-scan                                                                      | Multi-scan                                                       |
| Refinement method                                 | Full-matrix least squares on F <sup>2</sup>                                     | Full-matrix least squares on F <sup>2</sup>                      |
| Data/restraints/parameters                        | 3686/ 0/ 224                                                                    | 3130/ 0/ 234                                                     |
| Reflections collected                             | 24244                                                                           | 20311                                                            |
| Final R indices [ I > 2σ (I) ]                    | R=0.0273<br>wR <sub>2</sub> =0.1204                                             | R=0.0240<br>wR <sub>2</sub> =0.1103                              |
| Largest difference peak & hole(eÅ <sup>-3</sup> ) | -1.27, 0.83                                                                     | -0.92, 0.83                                                      |

**Table S2.** Selected bond distances (Å) and angles (°) in **1** and **2**

| <b>Selected Bonds</b> | <b>Value (Å)</b> | <b>Selected Angles</b> | <b>(°)</b> |
|-----------------------|------------------|------------------------|------------|
| <b>Complex 1</b>      |                  |                        |            |
| Ni1 - N1              | 2.105(2)         | N1 - Ni1 - N2          | 78.65(9)   |
| Ni1 - N2              | 1.9854(19)       | N2 - Ni1 - N3          | 78.69(9)   |
| Ni1 - N3              | 2.087(2)         | N2 - Ni1 - O2          | 174.33(8)  |
| Ni1 - O1              | 2.097(2)         | N2 - Ni1 - O1          | 91.07(8)   |
| Ni1 - O2              | 2.0557(18)       | N3 - Ni1 - O2          | 98.01(8)   |
| Ni1 - Cl1             | 2.386(13)        | N3 - Ni1 - N1          | 157.34(9)  |
|                       |                  | Cl1 - Ni1 - O1         | 174.75(6)  |
|                       |                  | Cl1 - Ni1 - O2         | 90.51(5)   |
|                       |                  | N1 - Ni1 - O2          | 104.59(8)  |
|                       |                  | N3 - Ni1 - O1          | 89.04(9)   |
|                       |                  | Cl1 - Ni1 - N1         | 89.67(6)   |
|                       |                  | Cl1 - Ni1 - N2         | 94.18(6)   |
|                       |                  | Cl1 - Ni1 - N3         | 91.90(6)   |
|                       |                  | O2 - Ni1 - O1          | 84.25(8)   |
| <b>Complex 2</b>      |                  |                        |            |
| Cu1 - N1              | 2.0552(18)       | N1 - Cu1 - N2          | 78.96(7)   |
| Cu1 - N2              | 1.9614(16)       | N2 - Cu1 - N3          | 78.82(7)   |
| Cu1 - N3              | 2.0572(17)       | Cl1 - Cu1 - N1         | 99.51(5)   |
| Cu1 - Cl1             | 2.4699(6)        | Cl1 - Cu1 - N2         | 98.36(5)   |
| Cu1 - Cl2             | 2.2496(6)        | Cl1 - Cu1 - N3         | 92.57(5)   |
|                       |                  | Cl1 - Cu1 - Cl2        | 104.39(2)  |
|                       |                  | Cl2 - Cu1 - N1         | 97.24(5)   |
|                       |                  | Cl2 - Cu1 - N2         | 157.25(5)  |
|                       |                  | Cl2 - Cu1 - N3         | 99.74(5)   |
|                       |                  | N1 - Cu1 - N3          | 156.00(7)  |

**Table S3.** Geometric features (distances in Å and angles in degrees) of  $\pi\cdots\pi$  interactions obtained for **1** and **2**

| <b>Cg(ring I) - Cg(ring J)</b> | <b>Cg<math>\cdots</math>Cg (Å)</b> | <b>Cg(I) <math>\cdots</math>perp (Å)</b> | <b>Cg(J) <math>\cdots</math>perp (Å)</b> | <b><math>\alpha</math> (°)</b> | <b><math>\beta</math> (°)</b> | <b><math>\gamma</math> (°)</b> | <b>Symmetry</b>       |
|--------------------------------|------------------------------------|------------------------------------------|------------------------------------------|--------------------------------|-------------------------------|--------------------------------|-----------------------|
| <b>Complex 1</b>               |                                    |                                          |                                          |                                |                               |                                |                       |
| Cg(3) $\cdots$ Cg(5)           | 3.593(2)                           | 3.453                                    | 3.493                                    | 2.84                           | 13.53                         | 16.04                          | -1/2+x, 1/2-y, -1/2+z |
| Cg(5) $\cdots$ Cg(3)           | 3.593(2)                           | 3.493                                    | 3.453                                    | 2.84                           | 16.04                         | 13.53                          | 1/2+x, 1/2-y, 1/2+z   |
| <b>Complex 2</b>               |                                    |                                          |                                          |                                |                               |                                |                       |
| Cg(1) $\cdots$ Cg(5)           | 3.4970(12)                         | 3.277                                    | 3.342                                    | 5.59                           | 17.11                         | 20.43                          | 1-x, 1-y, 1-z         |
| Cg(5) $\cdots$ Cg(1)           | 3.4969(12)                         | 3.342                                    | 3.277                                    | 5.59                           | 20.43                         | 17.11                          | 1-x, 1-y, 1-z         |
| Cg(2) $\cdots$ Cg(2)           | 3.5839(11)                         | 3.348                                    | 3.348                                    | 0.02                           | 20.90                         | 20.90                          | 1-x, 1-y, 1-z         |
| Cg(2) $\cdots$ Cg(5)           | 3.5184(12)                         | 3.346                                    | 3.354                                    | 2.51                           | 17.56                         | 18.02                          | 1-x, 1-y, 1-z         |
| Cg(5) $\cdots$ Cg(2)           | 3.5183(12)                         | 3.354                                    | 3.346                                    | 2.51                           | 18.02                         | 17.56                          | 1-x, 1-y, 1-z         |
| Cg(3) $\cdots$ Cg(4)           | 3.7469(12)                         | 3.341                                    | 3.473                                    | 4.93                           | 22.05                         | 26.9                           | -x, 1-y, 1-z          |
| Cg(4) $\cdots$ Cg(3)           | 3.7468(12)                         | 3.473                                    | 3.341                                    | 4.93                           | 26.9                          | 22.05                          | -x, 1-y, 1-z          |
| Cg(4) $\cdots$ Cg(5)           | 3.6812(13)                         | 3.299                                    | 3.281                                    | 2.31                           | 26.95                         | 26.34                          | 1-x, 1-y, 1-z         |
| Cg(5) $\cdots$ Cg(4)           | 3.6811(13)                         | 3.281                                    | 3.299                                    | 2.31                           | 26.34                         | 26.95                          | 1-x, 1-y, 1-z         |
| Cg(5) $\cdots$ Cg(5)           | 3.6706(13)                         | 3.288                                    | 3.288                                    | 0.02                           | 26.40                         | 26.40                          | 1-x, -y, 1-z          |

$\alpha$  = Dihedral angle between ring I and ring J (°);  $\beta$  = Cg(I)  $\rightarrow$  Cg(J) or Cg(I)  $\rightarrow$  Me vector and normal to plane I (°);  $\gamma$  = Cg(I)  $\rightarrow$  Cg(J) vector and normal to plane J (°); Cg–Cg = distance between ring centroids (Å); CgI $\cdots$ Perp = perpendicular distance of Cg(I) on ring J (Å); CgJ $\cdots$ Perp = perpendicular distance of Cg(J) on ring I (Å).

Cg(3) = Centre of gravity of ring [N1/C1/C2/C3/C4/C5] and Cg(5) = Centre of gravity of ring [N3/C11/C12/C13/C14/C15] for complex **1**, Cg(1) = Centre of gravity of ring [Cu1/N1/C5/C6/N2], Cg(2) = Centre of gravity of ring [Cu1/N2/C10/C11/N3], Cg(3) = Centre of gravity of ring [N1/C1/C2/C3/C4/C5], Cg(4) = Centre of gravity of ring [N2/C6/C7/C8/C9/C10] and Cg(5) = Centre of gravity of ring [N3/C11/C12/C13/C14/C15].

**Table S4.** Details of Hydrogen bond distances (Å) and angles (°) for **1** and **2**

| <b>D – H ...A</b> | <b>D (D – H)</b> | <b>D (HA)</b> | <b>D(D...A)</b> | <b>&lt;DHA</b> |
|-------------------|------------------|---------------|-----------------|----------------|
| <b>Complex 1</b>  |                  |               |                 |                |
| O1–H12...C12      | 0.78(4)          | 2.28(4)       | 3.052(3)        | 173(3)         |
| O1–H13...C12      | 0.72(3)          | 2.44(4)       | 3.115(3)        | 156(4)         |
| O2–H15...C11      | 0.83(4)          | 2.26(4)       | 3.073(2)        | 167(3)         |
| C4–H4...C11       | 0.93             | 2.82          | 3.693(3)        | 156            |
| <b>Complex 2</b>  |                  |               |                 |                |
| C2–H2...C11       | 0.97(3)          | 2.76(3)       | 3.446(2)        | 128(2)         |
| C4–H4...C11       | 0.88(3)          | 2.64(3)       | 3.479(2)        | 159(2)         |

**Table S5.** Geometric features (distances in Å and angles in degrees) of metal cation... $\pi$  interaction obtained for complex **2**

| <b>Cation ...Cg</b> | <b>Cg(I) ...Cation (Å)</b> | <b>Cation(J) ...Perp (Å)</b> | <b><math>\beta</math> (°)</b> | <b>Symmetry</b> |
|---------------------|----------------------------|------------------------------|-------------------------------|-----------------|
| Cu1...Cg (5)        | 3.848                      | 3.465                        | 25.8                          | 1-x, 1-y, 1-z   |

Cg(5) = Centre of gravity of ring [N3/C11/C12/C13/C14/C15]

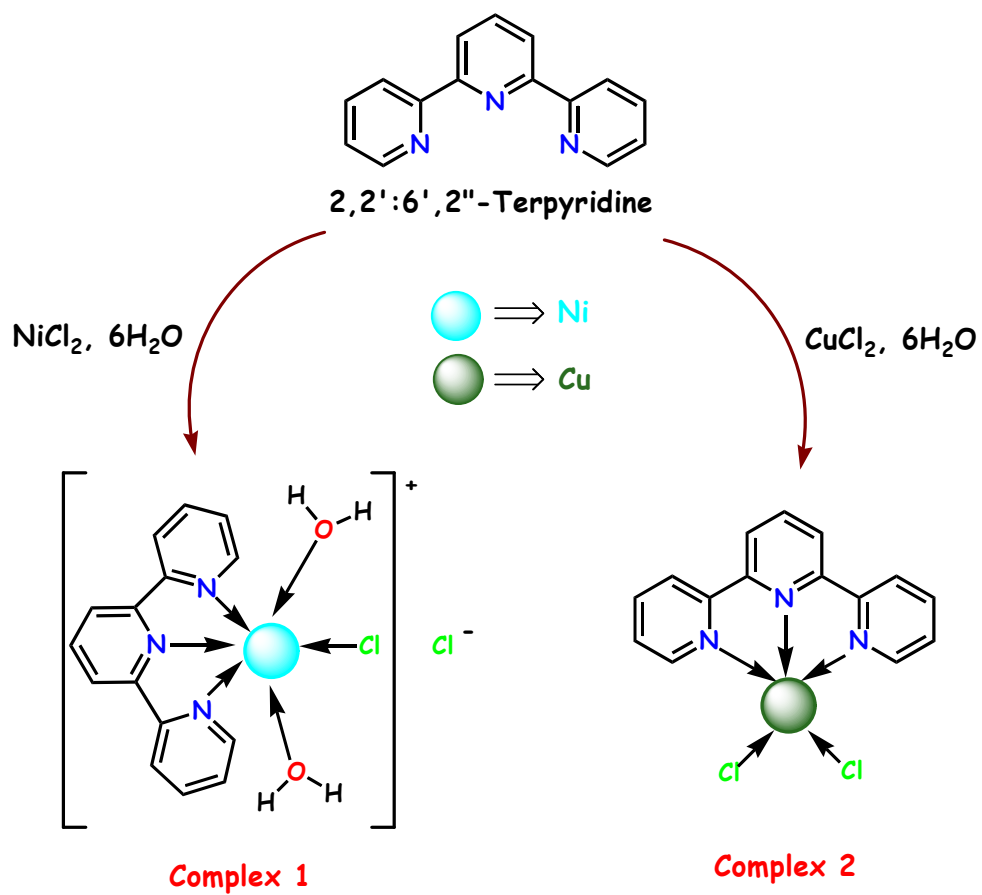

**Scheme S1.** Schematic representations of the synthesis of complex 1 and 2

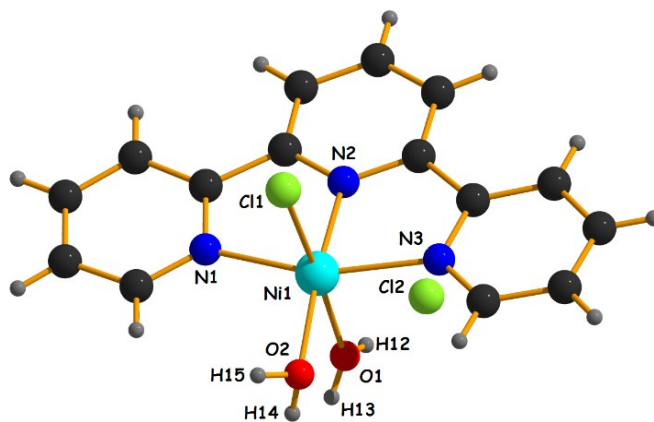

**Figure S1.** Asymmetric unit of Complex 1

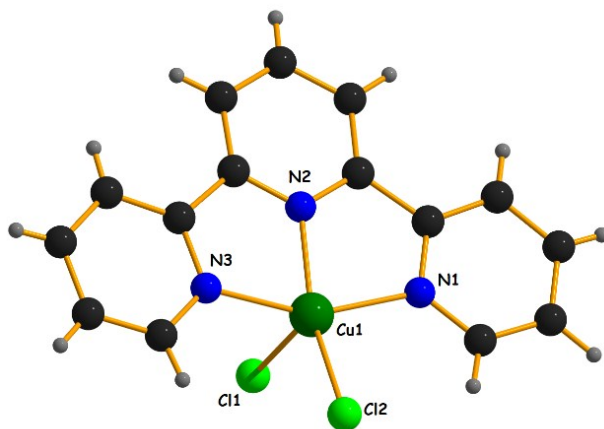

**Figure S2.** Asymmetric unit of Complex 2

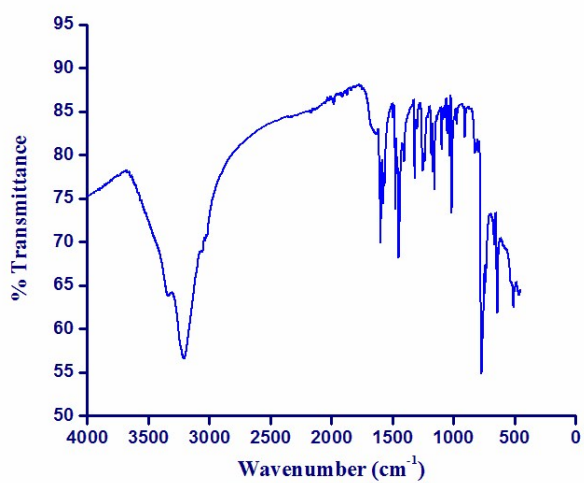

**Complex 1**

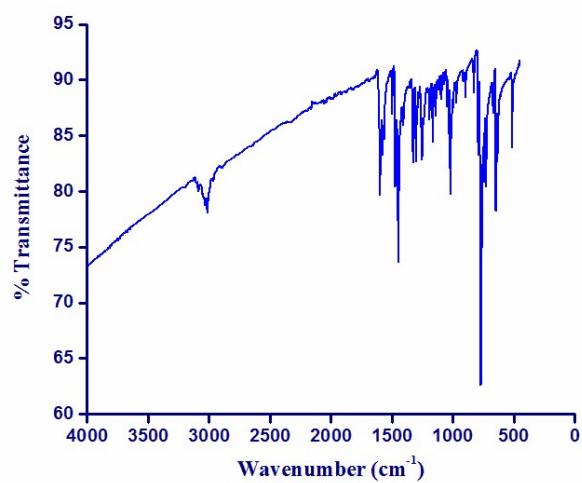

**Complex 2**

**Figure S3.** IR spectra for Complex 1 and 2

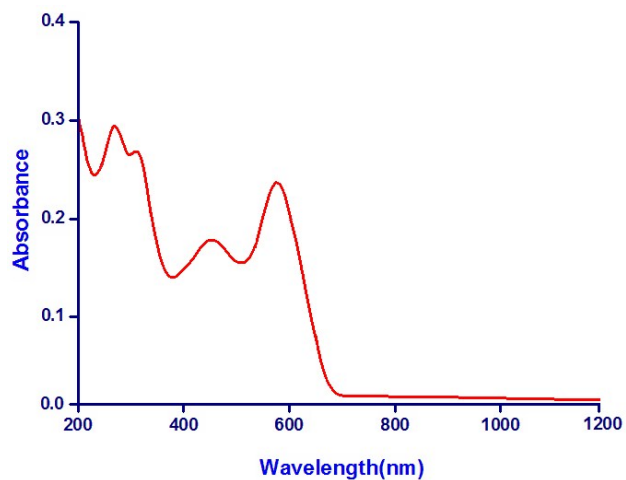

Complex 1

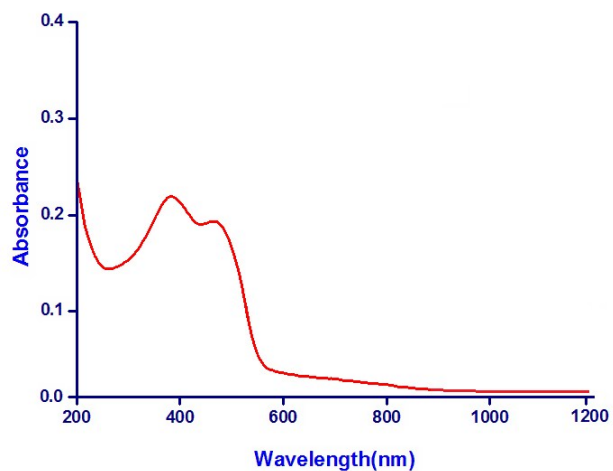

Complex 2

**Figure S4.** UV – Vis -NIR spectra for Complex 1 and 2

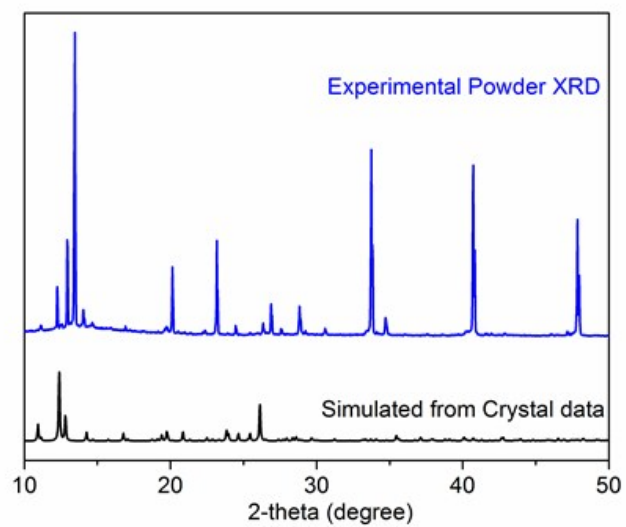

Complex 1

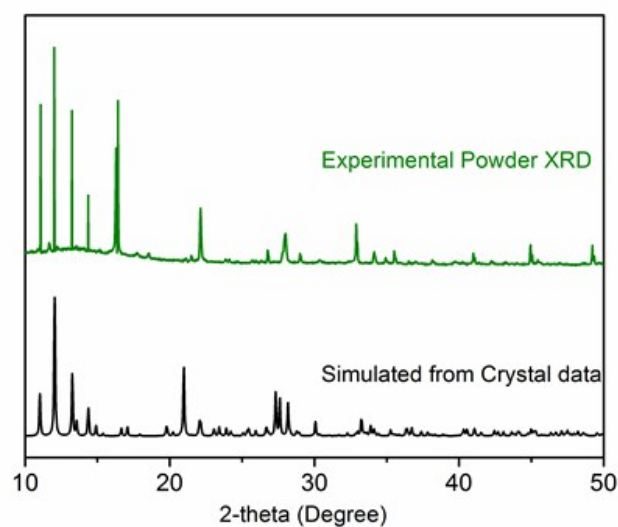

Complex 2

**Figure S5.** PXRD patterns of experimental powder XRD (blue) for complex 1 and green for complex 2 and simulated pattern from single crystal data (black)



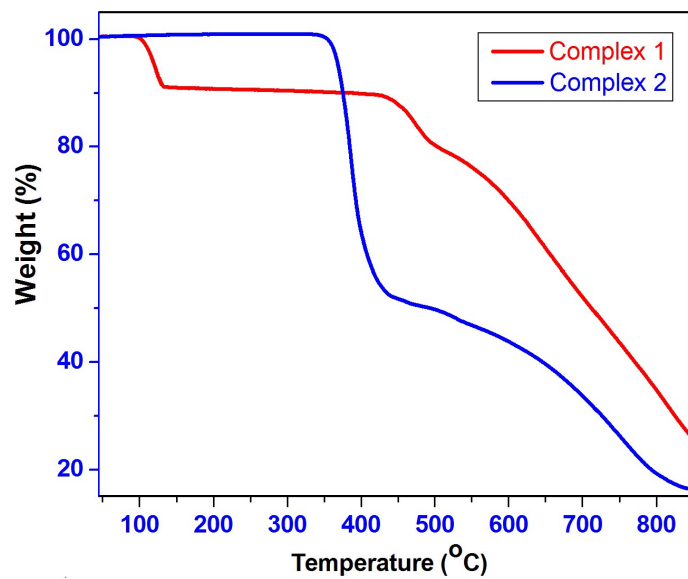

**Figure S6.** TGA of Complex 1 and 2 measured under N<sub>2</sub> atmosphere
